# Supplementary material
Source: publisher figshare collection journal article supplement (https://sage.figshare.com/ndownloader/files/12738758)
Supplement: Supplementary file 1 [file 12738758]

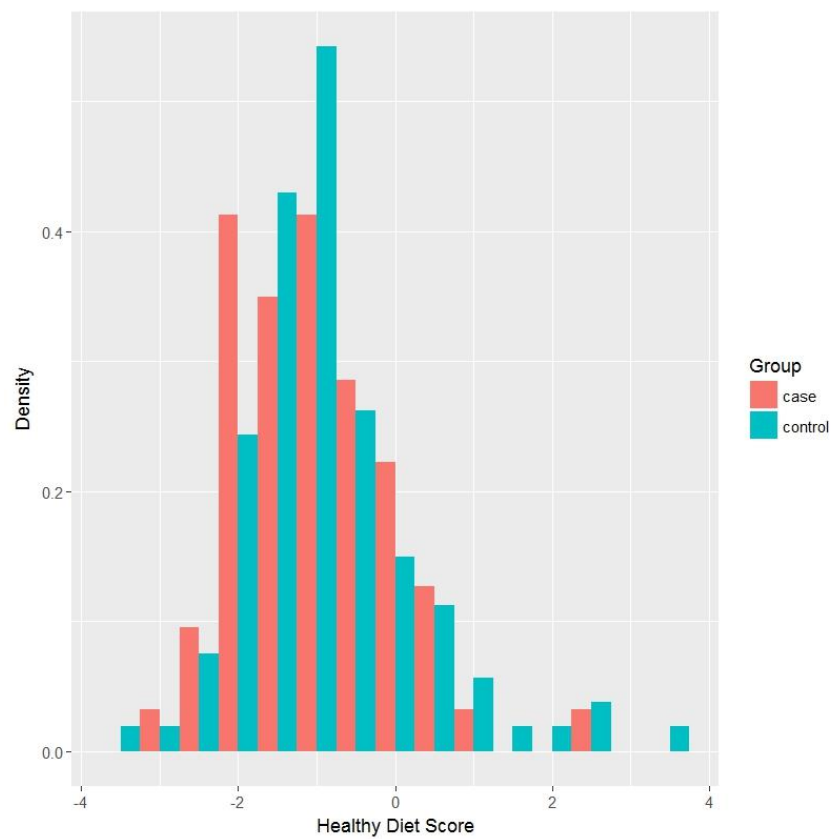

a)

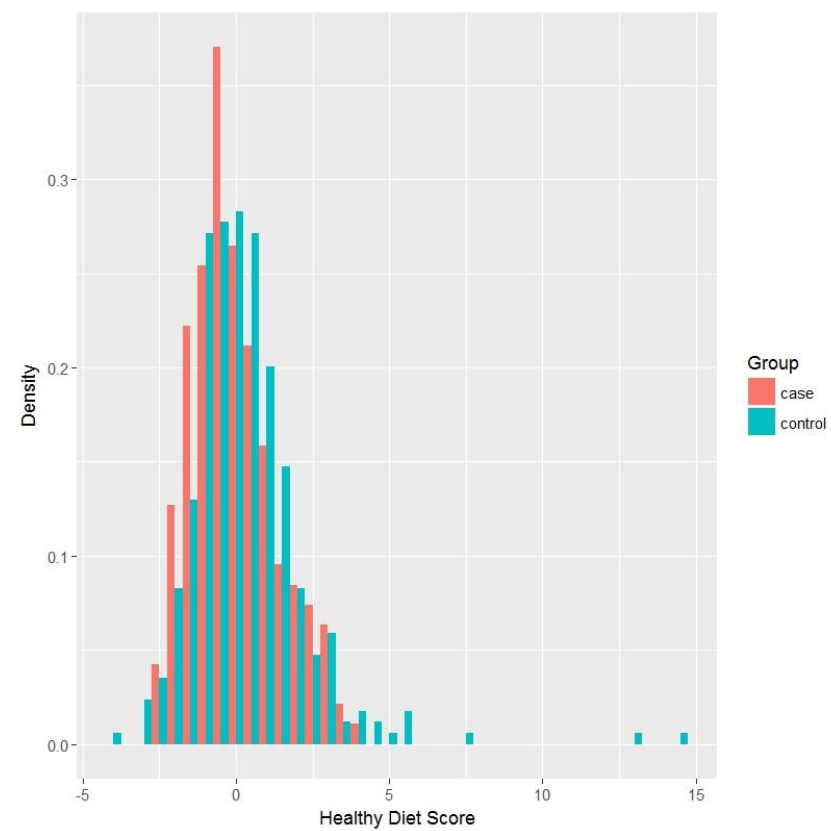

b)

Supplementary Figure 1. Histograms of the healthy dietary pattern score for case and control participants of the Ausimmune Study for a) men ( $n=63$  cases, 107 controls) and b) women ( $n=189$  cases, 339 controls)
